# Supplementary material
Source: Springer Nature journal article supplement (https://www.springermedizin.de/resource/supplementary/12893_2004_61_MOESM1_ESM.pdf/9512832)

## Number of dissections by month

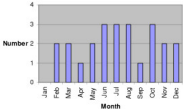

Supplement: MOESM1 [file 9512832]
